# Supplementary material for: Ecosystem fluxes of carbonyl sulfide in an old-growth forest: temporal dynamics and responses to diffuse radiation and heat waves
Source: Copernicus journal article supplement (doi:10.5194/bg-2018-85), 2018-03-09
Supplement: Supplementary file [file bg-2018-85-AC4-supplement.pdf]

1 **Ecosystem fluxes of carbonyl sulfide in an old-growth forest: temporal dynamics**  
2 **and responses to diffuse radiation and heat waves**

3 Bharat Rastogi<sup>1</sup>, Max Berkelhammer<sup>2</sup>, Sonia Wharton<sup>3</sup>, Mary E Whelan<sup>4</sup> Frederick C.  
4 Meinzer<sup>5</sup>, David Noone<sup>6</sup>, and Christopher J. Still<sup>1</sup>

5  
6 <sup>1</sup> Department of Forest Ecosystems and Society, Oregon State University, OR 97331,  
7 USA

8 <sup>2</sup> Department of Earth and Environmental Sciences, University of Illinois at Chicago,  
9 Chicago, Illinois, USA

10 <sup>3</sup> Atmospheric, Earth and Energy Division, Lawrence Livermore National Laboratory,  
11 7000 East Avenue, L-103, Livermore, CA 94550, USA

12 <sup>4</sup> Carnegie Institution for Science, 260 Panama St., Stanford, CA, USA, 94305

13 <sup>5</sup> USDA Forest Service, PNW Research Station, Corvallis, OR 97331, USA

14 <sup>6</sup> College of Earth, Ocean and Atmospheric Sciences, Oregon State University, OR  
15 97331, USA

16 Corresponding author: Bharat Rastogi ([bharat.rastogi@oregonstate.edu](mailto:bharat.rastogi@oregonstate.edu))

17  
18 **Abstract**

19 Carbonyl sulfide (OCS) has recently emerged as a tracer for terrestrial carbon uptake.  
20 While physiological studies relating OCS fluxes to leaf stomatal dynamics have been  
21 established at leaf and branch scales and incorporated in global carbon cycle models, the  
22 quantity of data from ecosystem-scale field studies remains limited. In this study, we  
23 employ established theoretical relationships to infer ecosystem-scale plant OCS uptake  
24 from mixing ratio measurements. OCS fluxes showed a pronounced diurnal cycle, with  
25 maximum uptake during mid-day. OCS uptake was found to scale with independent  
26 measurements of CO<sub>2</sub> fluxes over a 60-m-tall old-growth forest in the Pacific  
27 Northwestern U.S. (45°49'13.76" N; 121°57'06.88") at daily and monthly timescales  
28 under mid-high light conditions across the growing season in 2015. OCS fluxes tracked  
29 changes in soil moisture, and were strongly influenced by the fraction of downwelling  
30 diffuse light. Finally, we examine the effect of sequential heatwaves on fluxes of OCS,  
31 CO<sub>2</sub> and H<sub>2</sub>O. Our results bolster previous evidence that ecosystem OCS uptake is  
32 strongly related to stomatal dynamics, and measuring this gas improves constraints on  
33 estimating photosynthetic rates at the ecosystem scale.

34  
35 **1. Introduction**

36 Carbonyl Sulfide (OCS) is the most abundant sulfur gas in the atmosphere, with a mean  
37 atmospheric concentration of ~500 ppt (parts per trillion), and therefore a significant part  
38 of the tropospheric and stratospheric sulfur cycles, with implications for the global  
39 radiation budget and ozone depletion (Johnson et al., 1993; Notholt et al., 2003). The  
40 dominant sink of atmospheric OCS is vegetation (Kesselmeier and Merk, 1993; Kettle et  
41 al., 2002; Montzka et al., 2007 and references therein), through rapid and irreversible  
42 hydrolysis by the ubiquitous enzyme carbonic anhydrase (Protoschill-Krebs, Wilhelm, &

43 Kesselmeier, 1996; Protoschill-Krebs and Kesselmeier, 1992). Recent advances in  
44 spectroscopic technology have enabled continuous in-situ measurements of OCS on  
45 timescales that are relevant to understanding stomatal function at the leaf-scale (Stimler  
46 et al., 2010a, 2010b), branch scale (Berkelhammer et al., 2014) and the ecosystem scale  
47 (Kooijmans et al., 2017; Wehr et al., 2017). An important distinction between OCS and  
48 CO<sub>2</sub> cycling is the absence of a retroflux from actively photosynthesizing leaves (OCS  
49 emissions have been reported from stressed crops following severe fungal infection;  
50 Bloem et al., 2012). However, the normalized leaf uptake ratio of OCS:CO<sub>2</sub> (LRU;  
51 Sandoval-Soto et al., 2005) is relatively constant at medium to high light levels (Maseyk  
52 et al., 2014; Stimler et al., 2010), making it an excellent proxy for quantifying plant  
53 productivity (GPP; Asaf et al., 2013; Billesbach et al., 2014; Blonquist et al., 2011). On  
54 the other hand, both uptake and emissions of OCS from soils have been identified  
55 (Whelan et al., 2016; Sun et al., 2015; Maseyk et al., 2014; Kesselmier et al., 1999).  
56 While ecosystem-scale measurements of OCS continue to establish links between OCS  
57 uptake and GPP in different ecosystems (for a comprehensive list of ecosystem scale  
58 studies readers are referred to Figure 2 in Whelan et al., 2017), inconsistencies persist.  
59 For example, in an oak-savanna woodland in southern France Belviso et al. (2016) found  
60 that OCS exchange was strongly influenced by photosynthesis during early morning  
61 hours, while meaningful values of LRU could only be calculated for a few days in the  
62 early afternoons. Commane et al. (2015) were unable to explain mid-summer emissions  
63 of OCS at a mid-latitude deciduous forest. Uncertainties highlighted above argue for  
64 field-scale measurements of OCS in a variety of ecosystems, particularly as OCS flux  
65 predictions have recently been incorporated to inform estimates of plant productivity in  
66 global carbon cycle models (Campbell et al., 2017a; Hilton et al., 2017; Launois et al.,  
67 2015).

68  
69 OCS fluxes have not been previously reported for old-growth forests, although a recent  
70 study using flask samples inferred large uptake of OCS in coastal redwood forests in  
71 northern California (Campbell et al., 2017b). Rastogi et al. (in revision) found large  
72 drawdowns in mixing ratios of OCS at an old growth forest in the pacific northwestern  
73 U.S., and significant uptake of this gas by various components of the ecosystem (leaves,  
74 soils, and epiphytes). In this study, we report estimates of OCS fluxes from an old-growth  
75 forest and place them in the context of ecosystem carbon and water cycling. Additionally,  
76 we investigate the response of CO<sub>2</sub>, H<sub>2</sub>O and OCS fluxes to changes in the fraction of  
77 downwelling diffuse radiation, as well as heat wave events through the growing season.  
78 Technological constraints posed limitations in measuring fast-response OCS fluxes so  
79 instead we combine continuous in-situ measurements of OCS mixing ratios above and  
80 within the canopy with established theoretical equations for OCS uptake (see Berry et al.,  
81 2013; Commane et al., 2015; Seibt et al., 2010) to characterize OCS fluxes using a simple  
82 empirical model and compare them with ecosystem uptake of CO<sub>2</sub> from co-located eddy  
83 covariance measurements.

## 84 85 **2. Methods**

### 86 2.1. Site Description

87 Measurements were made at the Wind River Experimental Forest (WR), located within  
88 the Gifford Pinchot National Forest in southwest Washington state, USA (45°49'13.76"

89 N; 121°57'06.88"; 371 m above sea level). The site is well studied and described in great  
90 detail (Paw U et al., 2004; Shaw et al., 2004; Wharton and Falk, 2016; Winner et al.,  
91 2004). The climate is classified as temperate oceanic with a strong summer drought. The  
92 forest is 478 ha of preserved old-growth evergreen needle-leaf forest, with dominant tree  
93 species of Douglas fir (*Pseudotsuga menziesii*) and Western hemlock (*Tsuga*  
94 *heterophylla*). The tallest Douglas fir trees are between 50 and 60m, while the shade-  
95 tolerant hemlocks are typically between 20-30 m high. Maximum rooting depth is 1–2 m  
96 for the tallest, dominant Douglas-fir trees although most of the root biomass is  
97 concentrated in the first 0.5 m (Shaw et al., 2014). The cumulative LAI is estimated to be  
98 8-9 m<sup>2</sup> m<sup>-2</sup> (Parker et al., 2004). Additionally, the ecosystem hosts a large diversity of  
99 mosses, lichens and other epiphytic plants, which play an important role in canopy OCS  
100 dynamics (Rastogi et al., in revision). The soils are volcanic in origin, although most of  
101 the forest surface is comprised of decaying organic matter (Shaw et al., 2004).

102

103 2.2. Study period: Measurements reported here are between April 18- Dec 31, 2015.  
104 However, in early November an intake line at the top of the canopy was damaged after a  
105 rainstorm. Measurements continued at the other intake heights (see sections 2.4 and 2.9).  
106 Therefore, ecosystem fluxes and related analyses in this study cover 136 days between  
107 April 18 and October 31, while chamber based soil fluxes are reported for the months of  
108 August-December. Gaps in the time series due to analyzer maintenance correspond to Jun  
109 26-28, July 6-17, August 4-7, August 24 and October 4-7. April-October roughly  
110 corresponds to most of the growing season, although at this site GPP usually peaks early  
111 in March-April, when soil moisture is high and ecosystem respiration flux is low, while  
112 plant productivity is typically severely light and temperature limited in the months of  
113 November-December (Wharton and Falk, 2016). Environmental conditions during the  
114 measurement campaign are shown in Figure 1 are represent a typical Mediterranean-type  
115 climate, with temperature peaking in July and minimal to no measured rainfall between  
116 June and September. This results in high summertime atmospheric vapor pressure deficit  
117 (VPDa), and soil moisture declines steadily through the summer period, with some  
118 recharge following rare precipitation events in September and then more commonly in  
119 October. The measurement period also encompasses three distinct heat waves,  
120 characterized by anomalously high air temperatures and mid-day VPDa values (often  
121 exceeding 4 kPa). We examine the response of OCS and CO<sub>2</sub> fluxes during these heat  
122 waves.

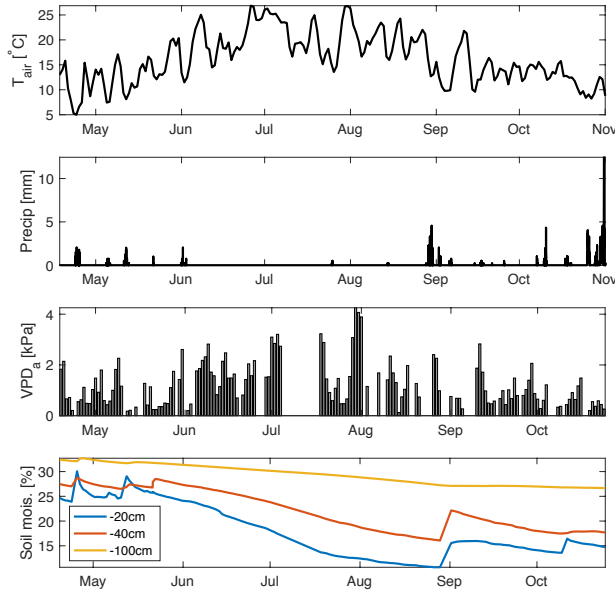

123  
 124 Figure 1. Environmental conditions at Wind River during the measurement campaign.  
 125 daily mean air temperature (a), precipitation (b) mid-day VPDa (c) and soil moisture  
 126 measured at three depths (d) are shown.

127 2.3. CO<sub>2</sub> and H<sub>2</sub>O eddy flux measurements: Carbon, water and energy fluxes have been  
 128 collected since 1998 at the Wind River AmeriFlux tower (US-wrc; Paw U et al. 2004).  
 129 For further details readers are referred to Falk et al., (2008; instrumentation and data  
 130 processing), and Wharton et al., (2012) and Wharton and Falk, (2016) for multi-year  
 131 carbon and water flux measurements and synthesis.

132  
 133 2.4. OCS measurements: A commercially available off-axis integrated cavity output  
 134 spectroscopy analyzer manufactured by Los Gatos Research Inc., (LGR; model 914-  
 135 0028) was deployed at the base of the tower in an insulated and temperature-controlled  
 136 shed. The instrument measures mixing ratios of OCS, CO<sub>2</sub>, H<sub>2</sub>O and CO simultaneously  
 137 at a maximal scan rate of 5Hz. The system uses a 4.87 μm cascade laser coupled to a high  
 138 finesse 800 cm<sup>3</sup> optical cavity and light transmitted through the cavity is focused into a  
 139 cooled and amplified HgCdTe detector. OCS is detected at ~2050.40 cm<sup>-1</sup>, CO<sub>2</sub> at  
 140 2050.56 cm<sup>-1</sup>, CO at ~2050.86 cm<sup>-1</sup>, and H<sub>2</sub>O at ~2050.66 cm<sup>-1</sup>. Pressure broadening  
 141 associated with changes in the concentration of water vapor in the samples is corrected  
 142 for in the analysis routine. Air was sampled through 0.25'' diameter PFA tubing using a  
 143 diaphragm pump at a flow rate of 2L min<sup>-1</sup>, from inlets located at 70m (at the height of  
 144 the eddy flux instrumentation), 60m (canopy top), 20m, 10m, and 1m. The sampling  
 145 frequency was 0.1Hz and the sampling interval was 5 minutes. The first minute of each  
 146 sampling interval was removed to avoid any inter-sampling mixing. The remaining data  
 147 were checked for temperature and pressure fluctuations inside the measurement chamber,  
 148 and a moving window filter was used to eliminate any sudden outliers in the data. Mixing  
 149 ratios were aggregated to provide hourly means. For detailed information regarding  
 150 instrumentation and the measurement readers are referred to Rastogi et al (in revision),  
 151 Berkelhammer et al. (2014) and Belviso et al. (2016).

152 2.5. Calibration: Calibration was performed using ambient air stored in insulated tanks as  
153 a secondary reference. Air was sampled into the analyzer daily, and tank pressure was  
154 routinely monitored to check for leaks. Glass flasks were randomly sampled from  
155 calibration tanks and measured against a NOAA GMD reference standard. Cross-  
156 referencing revealed that the accuracy of the measurement was within the reported  
157 minimum uncertainty of the instrument (of 12.6 pmol mol<sup>-1</sup>; Berkelhammer et al., 2016).

158  
159 2.6. Thermal Camera measurements: Leaf temperatures were measured from October 28,  
160 2014 to January 28, 2016 using a FLIR A325sc thermal camera (FLIR System Inc.,  
161 Wilsonville, OR), in which a FLIR IR 30-mm lens (focal length: 30.38 mm; field of  
162 view: 15°×11.25°) was installed. The thermal camera has a pixel resolution of 320 × 240.  
163 Within the field of view (FOV), spot sizes of a single pixel are 0.83 cm from 10-m  
164 distance and 8.3 cm from 100-m distance. Manufacturer-reported errors in original  
165 measured thermal temperatures are ±2 °C or ±2% of the measurements. The camera  
166 model is identical to one used in another study at an AmeriFlux site in central Oregon  
167 (US Me-2), and the detailed specifications can be found in Kim et al. (2016). To monitor  
168 a larger canopy region, a pan-tilt unit (PTU) was used for motion control, allowing  
169 multiple canopy thermal image acquisition within one motion cycle. We used a FLIR  
170 PTU-D100E (FLIR System Inc., Wilsonville, OR; (<http://www.flir.com/mcs>)) to move the  
171 thermal camera vertically and horizontally at specific pan and tilt angles. We selected  
172 five pan-tilt angle (PT) positions representing the upper canopy (i.e., ~40 to 60 m above  
173 the forest floor) to estimate leaf temperatures in this study.

174 2.7. Diffuse light measurement and analyses: An SPN1 Sunshine Pyranometer (Delta-T  
175 Devices Ltd., Cambridge, U.K.) was installed at the top of the canopy and collected direct  
176 and diffuse shortwave downwelling radiation from April- December 2015. Measurements  
177 were made every 1 min, and then aggregated to hourly means. We limited our analyses of  
178 diffuse radiation data to include only mid-day hours (between 11am-1pm) to minimize  
179 the influence of solar angles on diffuse radiation fractions. We defined three distinct  
180 periods based on the ratio of diffuse radiation to total incoming solar radiation (*fdiff*).  
181 Data were characterized as clear if *fdiff* < 0.2; partly cloudy if *fdiff* > 0.2 and *fdiff* < 0.8,  
182 and overcast if *fdiff* > 0.8.

183 2.8. OCS flux estimation: ‘Canopy-scale leaf’ OCS flux was estimated using flux-  
184 gradient similarity, following Commane et al., 2015.

185 
$$F_{OCS} = F_{H_2O} \cdot \frac{g_{OCS}}{g_{H_2O}} \quad (1)$$

186  
187 where  $F_{OCS}$ ,  $F_{H_2O}$ ,  $g_{OCS}$  and  $g_{H_2O}$  are the fluxes and gradients of OCS and H<sub>2</sub>O,  
188 respectively. Following Seibt et al., (2010) and Berry et al., (2013), we assume that OCS  
189 is irreversibly and rapidly consumed inside leaves, such that the gradient between  
190 ambient air and the leaf interior effectively reduces to the ambient measured OCS mixing  
191 ratio:

192  
193 
$$g_{OCS} = \chi_{OCS}^a - \chi_{OCS}^l = \chi_{OCS}^a \quad , \quad (2)$$

194 where  $g_{OCS}$  is defined as the gradient of OCS between ambient air and the leaf  
195 intercellular spaces ( $\chi$  is the mixing ratio of OCS and superscripts *a* and *l* refer to ambient

196 and leaf respectively). In our study,  $\chi_{OCS}^a$  is the measured mixing ratio at the canopy top  
 197 (60m) instead of above canopy (70m) to account for turbulent transport between the  
 198 canopy top and air that is above the canopy top. We use vapor pressure deficit (VPD) as  
 199 the corresponding gradient for H<sub>2</sub>O, under the key assumption that the intercellular leaf  
 200 surfaces are saturated with water vapor. While VPD is usually calculated using air  
 201 temperature, a more accurate calculation can be performed with leaf temperatures, which  
 202 can deviate significantly from air temperatures (Kim et al. 2016), leading to significant  
 203 differences between the VPD of ambient air and that at the leaf surface (Fig. 2a and 3d in  
 204 this study). Previously leaf temperatures have been inferred from sensible heat fluxes,  
 205 wind speed and air temperatures (e.g. Wehr et al., 2017), here we use explicit  
 206 measurements of leaf skin temperatures to estimate leaf-air VPD (VPD<sub>l</sub>). Analogous to  
 207 Eq (3),  
 208

$$209 \quad g_{H_2O} = \chi_{H_2O}^l - \chi_{H_2O}^a = \frac{(e_i - e_a)}{P} = \frac{VPD_l}{P}, \quad (3)$$

210 where  $e_i$  is saturation vapor pressure in the leaf sub-stomatal cavity (kPa), using leaf skin  
 211 temperature,  $e_a$  is the actual vapor pressure (kPa),  $P$  is the measured atmospheric pressure  
 212 (kPa) at the tower top, and  $\chi_{H_2O}^l$  and  $\chi_{H_2O}^a$  (ppth) are the leaf and ambient H<sub>2</sub>O mixing  
 213 ratios at the canopy top. Finally, since gradients of OCS and H<sub>2</sub>O are estimated between  
 214 ambient air and the leaf intercellular spaces, these are normalized by the ratio of  
 215 diffusivities of these two species in air (Seibt et al., 2010; Wohlfahrt et al., 2012).  
 216

217  $F_{H_2O}$  was measured using eddy covariance at the tower top (70m). In high LAI forests  
 218 with minimal exposed soil, such as those of the Pacific Northwest, fluxes of  $F_{H_2O}$  can be  
 219 treated as a good proxy for transpiration, since soil evaporation should be minimal. We  
 220 excluded rainy days, as well as two days following rainfall, to only capture periods when  
 221  $F_{H_2O}$  can be assumed to be dominated by transpiration. Equation (1) was evaluated only  
 222 under the condition  $F_{H_2O} > 0.2 \text{ mmol m}^{-2} \text{ s}^{-1}$ . We restricted our analyses to daytime, when  
 223 OCS flux is assumed to be related to leaf CO<sub>2</sub> uptake (Maseyk et al., 2014; Wehr et al.,  
 224 2017).  
 225

226 Leaf Relative uptake was calculated following Seibt et al (2010).  
 227

$$228 \quad LRU = \frac{F_{OCS}}{GPP} \cdot \frac{\chi_{CO_2}}{\chi_{OCS}}, \quad (5)$$

229 where GPP was estimated from CO<sub>2</sub> fluxes measured at the tower top, using a nighttime  
 230 based partitioning approach (Reichstein et al., 2005), that was optimized for the site (Falk  
 231 et al., 2008). Finally, canopy conductance ( $G_c$ ) was estimated using a simple flux-  
 232 gradient approach with the assumption that the canopy (or ecosystem) acts as a single big  
 233 leaf.  
 234

$$235 \quad G_c = F_{H_2O} \cdot \frac{VPD_l}{P}, \quad (6)$$

236  
 237 2.9. Surface Fluxes: A long-term automatic soil survey chamber (Li-Cor 8100-104, 20  
 238 cm diameter) was installed at three 0.03 m<sup>2</sup> surface sites in series, within 1 meter of each  
 239 other. All plastic and rubber parts had been removed from the chamber and replaced with  
 240 materials compatible with OCS measurements: stainless steel, PFA plastic, and Volara

241 foam. Blank measurements were performed in the laboratory before deployment and  
242 OCS concentrations in the chamber were found to be statistically indistinguishable from  
243 incoming ambient concentrations. The stainless-steel chamber top opened and closed  
244 automatically on a timer. Gas was drawn through the chamber via a pump downstream of  
245 the analyzer, and the 3 Lmin<sup>-1</sup> flow rate was confirmed with a mass flow meter. When the  
246 chamber was open, ambient near-surface air was observed. When the chamber was  
247 closed, trace gas concentrations reached a stable state for at least 2 minutes during the 10-  
248 minute incubation time. The difference between the ambient concentration and the stable  
249 closed-chamber concentration were used to calculate the surface fluxes of OCS and CO<sub>2</sub>.

$$250 \quad F_{forest\ floor} = M_c \Delta\chi \cdot A^{-1}, \quad (7)$$

251 where  $M_c$  is the measured flow rate into the chamber (converted from Lmin<sup>-1</sup> to mols<sup>-1</sup>  
252 using the ideal gas law) and  $\Delta\chi$  is the difference between mixing ratios of OCS or CO<sub>2</sub> in  
253 ambient air and the chamber and A is the surface area of the chamber. The minimum flux  
254 detectable with this method was 1.2 pmolm<sup>-2</sup>s<sup>-1</sup> uptake or production.

255 Care was taken to select sites characteristic of the surface, which was generally springy  
256 and covered in a mat of mosses and lichen. Surface flux observations were made at site 1  
257 from July 6 to 16, site 2 from August 13 to October 7, and site 3 from November 6 to  
258 December 2, 2015. The first site was visually similar to the subsequent two sites at the  
259 surface, though the chamber base of the first site was installed into the moss layer and a  
260 barely decomposed fallen tree. When a soil sample was attempted to be extracted from  
261 the footprint of the chamber base, several liters of intact wood litter were removed. The  
262 influence of the developed soil on site 1 is therefore considered minimal. Site 2 was  
263 selected nearby and observations were made until a dominant tree fell on the soil  
264 chamber. The chamber was repaired and re-installed a month later at site 3 and  
265 observations continued without incident until the chamber was removed in advance of the  
266 soil freezing.

### 267 **3. Results and Discussion:**

268 3.1. Ecosystem fluxes: The composite diurnal cycles for CO<sub>2</sub>, water vapor and OCS and  
269 fluxes are shown (Fig. 2a-c). The total ecosystem flux of OCS ( $F_{OCS}$ ; Fig 2.b.) follows a  
270 pronounced diurnal cycle that peaks during daylight hours. The vertical profile of mixing  
271 ratios measured throughout the canopy is also shown (right y-axis and orange lines in  
272 Fig.2.b). OCS mixing ratios are highest at the canopy top and lowest near the forest floor,  
273 but mixing ratios increase from the early morning to mid-afternoon. Together these  
274 processes are indicative of ecosystem uptake and downward entrainment of boundary  
275 layer air. While entrainment helps explain the diurnal cycle of observed mixing ratios,  
276 this flux integrates to zero at daily and longer time scales (Rastogi et al., in revision). The  
277 shape of the  $F_{OCS}$  curve is very similar to those of net and gross carbon fluxes (Fig 2.b-c),  
278 although  $F_{OCS}$  was consistently negative throughout the 24-hour period, implying  
279 ecosystem uptake during nighttime and daylight hours. While nighttime uptake of OCS  
280 (mean nighttime flux  $\sim -10 \pm 1$  pmolm<sup>2</sup>s<sup>-1</sup>) is likely due to a combination of soil,  
281 epiphyte, and vascular plant uptake due from partially closed stomata, daytime uptake is  
282 likely dominated by vascular plant stomatal activity. Leaf relative uptake, a ratio of  
283  $F_{OCS}$ :GPP normalized by the mean mixing ratios of OCS:CO<sub>2</sub>, showed a strong light

284 dependence. High-light, mid-day values ranged between 3-4, which is higher than those  
 285 observed at other forest systems (Kooijmans et al., 2017; Wehr et al., 2017) but well  
 286 within the spread of values obtained in a recent meta-analyses of OCS studies for  
 287 vegetated ecosystems (Whelan et al., 2018). The diurnal cycle was found to be  
 288 asymmetric, with peak values observed in the early morning, when stomatal conductance  
 289 is likely to be high (Winner et al., 2004), but GPP is limited by low light levels. It is  
 290 important to note that LRU is likely influenced by large amounts of epiphyte and  
 291 understory vegetation, which assimilate OCS even at times when ecosystem  $\text{CO}_2$  uptake  
 292 is low or zero. Epiphytic assimilation of OCS is highly influenced by moisture content  
 293 (Gimeno et al., 2017) and is typically higher through the night and in the early mornings  
 294 at this site (Rastogi et al., in revision). Moreover, in tall old-growth forests, leaf area is  
 295 vertically distributed over a much larger part of the canopy compared to other forests  
 296 (Parker et al., 2004). While leaves at the canopy top exercise tight stomatal control to  
 297 limit water loss and minimize hydraulic failure (Woodruff et al., 2007) leaves lower  
 298 down in the canopy, including those of understory vegetation, likely impose less stomatal  
 299 control of transpiration (Winner et al., 2004). Lower-canopy leaves may therefore  
 300 continue to disproportionately assimilate OCS, even under low rates of carbon  
 301 assimilation (as  $\text{CO}_2$  uptake is additionally light limited).

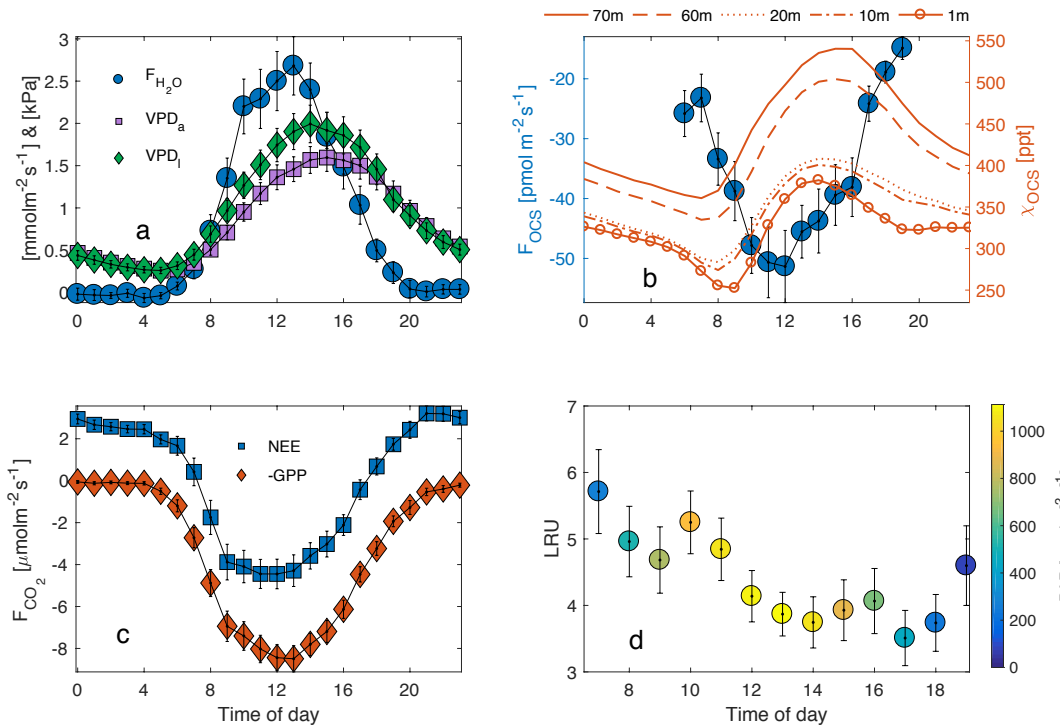

302

303 Figure 2. Diurnal cycle of  $\text{H}_2\text{O}$  flux (blue circles) and VPD estimated from air and leaf  
 304 temperatures (purple squares and green diamonds respectively; a), estimated OCS flux  
 305 (circles, left axis) and mixing ratio profile (right axis; b), NEE and GPP (blue squares and  
 306 red diamonds; c), and leaf relative uptake (calculated only during daylight hours, colors  
 307 represent Photosynthetically active radiation; d). Vertical bars indicate standard error.

308



309 3.2. Daily and seasonal dynamics: Daytime fluxes of OCS were correlated to independent  
 310 estimates of GPP (Fig. 3a), and uptake of both OCS and CO<sub>2</sub> reduced as soil moisture  
 311 declined. Variability in the relationship between fluxes of OCS and CO<sub>2</sub> and soil  
 312 moisture was related to VPD, which fluctuated as a response of changing cloud cover  
 313 (discussed later in sec. 3.4).

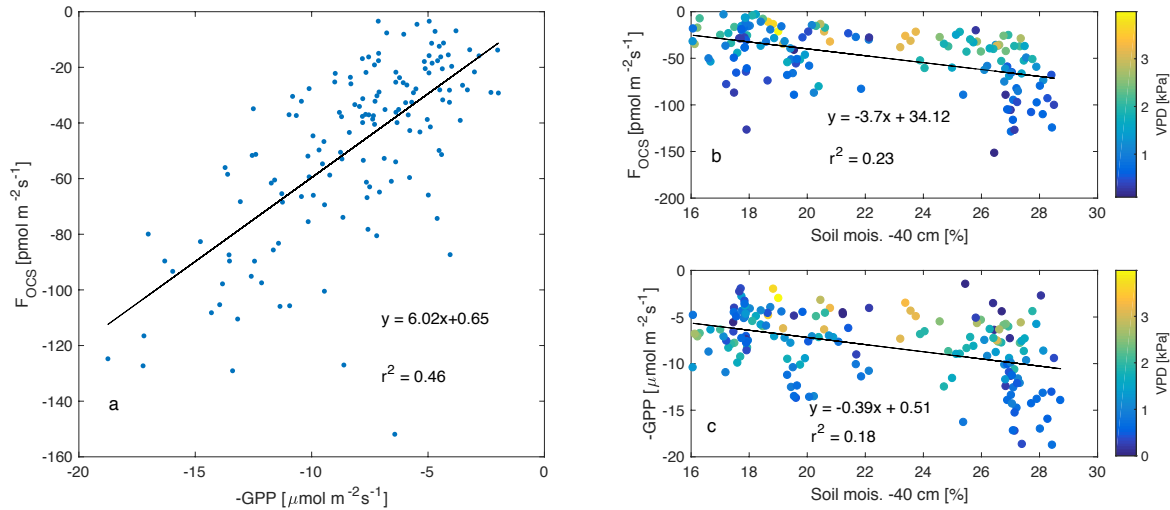

314

315 Figure 3.  $F_{OCS}$  was linearly correlated to GPP (plotted as a negative quantity to show  
 316 ecosystem uptake; a), while both  $F_{OCS}$  and GPP reduced as a function of decreasing soil  
 317 moisture (b-c). Data presented here are mid-day means, data in (b-c) are colored  
 318 according to VPD.

319 Ecosystem uptake of OCS and CO<sub>2</sub> (as well as GPP) was highest in April (Fig. 4a), and  
 320 declined as the soil drought progressed (Fig. 4f). Mean monthly maximum OCS flux was  
 321 estimated as  $-61 \pm 6 \text{ pmol m}^{-2} \text{ s}^{-1}$ , while daily mean maximum GPP over this period was  
 322 estimated as  $10 \pm 1 \text{ } \mu\text{mol m}^{-2} \text{ s}^{-1}$  (plotted as a negative quantity in Fig. 4b to show  
 323 ecosystem uptake). While the steepest declines in  $F_{OCS}$ , NEE and GPP happened between  
 324 the months of May and June,  $F_{OCS}$  continued to decline through the rest of the summer,  
 325 with a minimum in August, and remaining low in September and October. CO<sub>2</sub> fluxes  
 326 flattened between June-September, before declining again in October. While uptake of  
 327 OCS and CO<sub>2</sub> followed similar patterns, H<sub>2</sub>O flux remained high until mid-summer (Fig.  
 328 4c) before plunging in August, presumably due to a combination of high VPD (Fig. 4d)  
 329 and declining soil moisture (Fig. 4f), as plants exercised greater control over stomata.  
 330 This can be clearly seen in the seasonal cycle of canopy conductance ( $G_c$ ; Fig. 4e). Mean  
 331 monthly  $G_c$  was highest in the months of April and May, and then declined in response to  
 332 increasing VPD and decreasing soil moisture, before increasing again slightly in  
 333 September and October following soil recharge and decreased VPD due to precipitation  
 334 events. In October, soil water recharge, several rain-free days (Fig. 1), and lower VPD  
 335 (Fig. 4d) do not result in increased gas exchange, likely due to downregulation of  
 336 photosynthesis (Eastman and Camm, 1995), induced by photoprotective changes in the  
 337 xanthophyll cycle (Adams and Demmig-Adams, 1994).

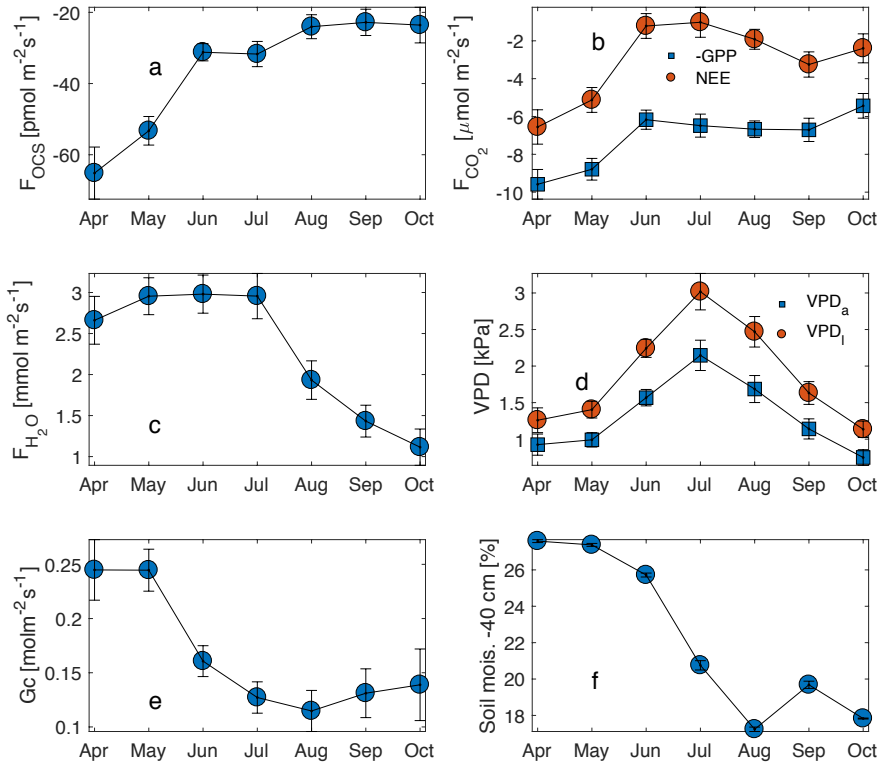

338

339 Figure 4. Monthly means for daytime  $F_{OCS}$ , NEE and -GPP (red circles and blue squares;  
 340 b), water vapor flux (c),  $VPD_a$  and  $VPD_l$  (blue squares and red circles; d), canopy  
 341 conductance ( $G_c$ ; e), and soil moisture at -40cm depth (f). Vertical bars indicate standard  
 342 error.

343 3.3. Surface Fluxes: Forest floor OCS fluxes were observed from 3 sites in series and  
 344 within 1 m of each other. Site 1 had approximately twice the OCS uptake compared to  
 345 the subsequent two sites and had a substantial layer of intact woody debris under the  
 346 chamber footprint. Site 2 and 3 had OCS fluxes similar to previous surface fluxes  
 347 reported for forests (Whelan et al., 2018). For all sites, there was no clear diurnal  
 348 pattern. For site 2, uptake immediately following chamber installation was higher (~6  
 349  $\text{pmol m}^{-2}\text{s}^{-1}$ ) than fluxes later on (all  $<6 \text{ pmol m}^{-2}\text{s}^{-1}$ ) when temperatures were lower (Fig  
 350 5). Site 3 did not have high uptake after chamber installation, and had consistent fluxes  
 351 between the detection limit and  $-6.2 \text{ pmol m}^{-2}\text{s}^{-1}$  for the first few weeks. When ambient  
 352 air temperatures dropped below freezing, uptake remained unchanged, except for the  
 353 largest uptake observed (6 to  $12 \text{ pmol m}^{-2}\text{s}^{-1}$ ) during two events when average air  
 354 temperature fluctuated from a cooling to warming trend. Soil temperature never dropped  
 355 below freezing during the experiment and was generally colder over time. We did not  
 356 observe any OCS emissions from the chamber based measurements, consistent with  
 357 recent studies that find that cooler, moist (Maseyk et al., 2014; Sun et al., 2016; Whelan  
 358 et al., 2016) and radiation limited (Kitz et al., 2017) soils do not emit OCS.

359 Surface  $\text{CO}_2$  emissions exhibited a relationship with temperature, where highest  
 360 production ( $\sim 25 \text{ } \mu\text{mol m}^{-2}\text{s}^{-1}$ ) corresponded with temperatures  $\sim 15^\circ\text{C}$ , and maximum flux  
 361 values decreased for warmer and colder temperatures.  $\text{CO}_2$  emissions had a diurnal

362 pattern, with lowest emissions at night and maximum emissions in late morning to mid-  
 363 afternoon. No obvious relationship emerges from CO<sub>2</sub> emission and OCS uptake, though  
 364 the high OCS uptake events in late November and early December have a linear  
 365 relationship with CO<sub>2</sub> emissions. For sites 2 and 3, the ratio of OCS emission to CO<sub>2</sub>  
 366 production, normalized by the concentration of OCS and CO<sub>2</sub> in the closed chamber, was  
 367 between -0.25 and -3.5 with a mean of -1. In contrast, the same ratio for site 1 varied  
 368 from -5 to -19 with a mean of -10.  
 369

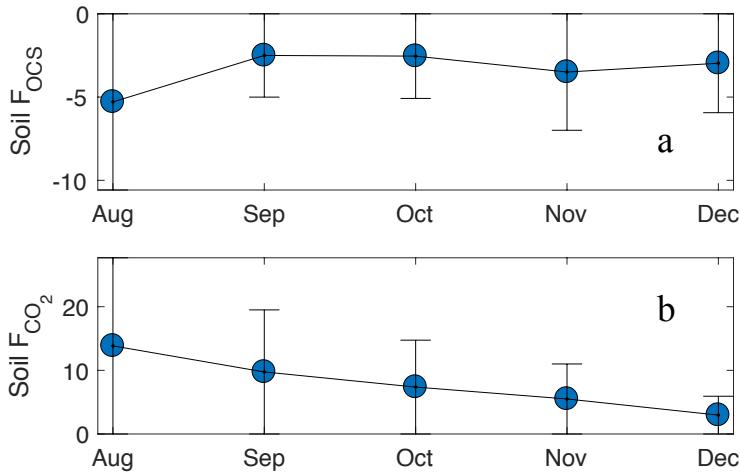

370 Figure 5. Surface F<sub>OCS</sub> and F<sub>CO<sub>2</sub></sub> from chamber measurements (brown squares in a-b)  
 371 from sites 2 and 3. Site 1 was atypical (see section 2.7) and therefore fluxes are not  
 372 shown. Values for site 1 F<sub>OCS</sub> and F<sub>CO<sub>2</sub></sub> were  $-22 \pm 0.3 \text{ pmolm}^{-2}\text{s}^{-1}$  and  $-83 \pm 2 \text{ μmolm}^{-2}\text{s}^{-1}$   
 373 respectively. Error bars indicate standard deviation.  
 374

375 3.4. Sensitivity to diffuse light: Mid-day fluxes of OCS and CO<sub>2</sub> were found to be  
 376 sensitive to changes in the fraction of diffused: total incoming shortwave radiation (*fdiff*;  
 377 Figure 6b-c). For these analyses, data were separated into three periods corresponding to  
 378 early summer (DOY 109-180), mid-late summer (DOY 180-240) and early fall (DOY  
 379 240-297), and binned into three categories: clear sky conditions, partly cloudy, and  
 380 overcast, defined in sec. 2.7. Mid-day VPD was highest under clear sky conditions and  
 381 lowest under overcast skies, but was most different across the three periods, during clear  
 382 skies (Fig. 6a). Consequently, OCS and CO<sub>2</sub> uptake was highest (most negative fluxes)  
 383 under overcast conditions during the early summer, and generally declined as *fdiff*  
 384 decreased across all time periods (Fig. 6b-d). Across the three periods, the rate of  
 385 decrease was much higher as *fdiff* changed from partially cloudy to clear. During the mid-  
 386 late summer, however, (red diamonds in Fig. 6a-f), the diffuse light effect resulted in  
 387 GPP and NEE being almost as high as during the early summer. F<sub>OCS</sub> was also highest  
 388 under partially cloudy skies during this time, and only showed a very weak decline under  
 389 completely overcast conditions. Overall, the behavior of OCS and CO<sub>2</sub> fluxes was similar  
 390 during the later time periods. Leaf relative uptake (LRU; calculated according to eq. 5)  
 391 was lowest under partly clear skies and highest under overcast conditions. This is because  
 392 under highly diffuse conditions, carbon uptake is additionally limited by light, whereas  
 393 F<sub>OCS</sub> is not (Wehr et al., 2017; Maseyk et al., 2014). The shape of the LRU curves can  
 394 additionally be explained by examining canopy conductance (G<sub>c</sub>; Fig. 6f), which was

395 also higher under overcast skies. LRU increased with  $G_c$  across all three periods (Fig.  
 396 6g), and appeared to be constant for  $G_c$  greater than  $\sim 400 \text{ mmol m}^{-2} \text{ s}^{-1}$ .

397 The diffuse light enhancement of stomatal and canopy conductance is well documented  
 398 across a range of forest ecosystems (Alton et al., 2007; Cheng et al., 2015; Hollinger et  
 399 al., 2017; Urban et al., 2007; Wharton et al., 2012). Lower VPD (Fig. 6a) and light levels  
 400 allow plants to keep stomata open at mid-day and continue fixing  $\text{CO}_2$ . Lower VPD  
 401 reduces transpirational losses, and the lack of VPD-induced partial stomatal closure  
 402 reduces the resistance to  $\text{CO}_2$  diffusion into the leaf. Correspondingly, the less directional  
 403 nature of diffuse solar radiation allows greater penetration into the canopy, thus  
 404 increasing photosynthesis across the entire canopy, even as a reduction in canopy top leaf  
 405 photosynthesis is observed due to a reduction in total radiation. In a multi-year analysis at  
 406 Wind River, Wharton et al., (2012) found that cloudy and partly cloudy sky conditions  
 407 during the peak-growing season lead to an increase in  $\text{CO}_2$  uptake. During our study,  $G_c$   
 408 was generally higher in the early growing season, but increased as sky conditions  
 409 changed from clear skies to overcast. This increase was similar across the three time  
 410 periods, even as the response of OCS and  $\text{CO}_2$  fluxes was different across these periods.  
 411 This indicates that declining soil moisture (Fig. 3b-c) likely limits gas exchange as the  
 412 summer progresses, even as canopy conductance can be reasonably high under overcast  
 413 skies.

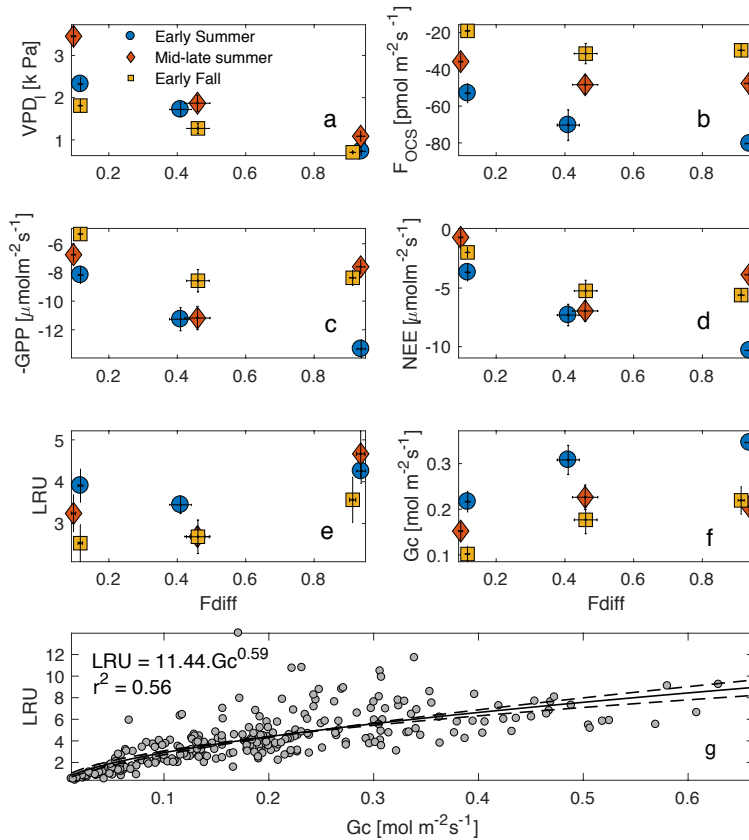

414

415 Figure 6. Mid-day VPD,  $F_{OCS}$ , NEE and GPP plotted against the fraction of diffuse  
 416 downwelling shortwave radiation (a-d) for early summer, mid-late summer and early fall

417 of 2015 (these periods are defined in Section 3.4). High values on the x-axis indicate  
418 completely overcast or cloudy conditions, whereas as low values indicated clear skies.  
419 LRU increases with increasing  $f_{diff}$  during each period but the increase is most  
420 pronounced in the early summer (e).  $G_c$  increases from clear to partly cloudy conditions  
421 across the three periods and plateaus during overcast sky conditions (f). Vertical bars  
422 indicate 1 standard error. Across the three periods, LRU increased with  $G_c$ , and levelled  
423 off at  $G_c$  values greater than  $\sim 0.5 \text{ mol m}^{-2}\text{s}^{-1}$  (g).

424 3.5. Response to heat waves: 2015 was the warmest year in large parts of the Pacific  
425 Northwest since records began in the 1930s (Dalton et al., 2017). We observed three  
426 distinct heat waves during the 2015 summer. These were in early June (DOY 157-160),  
427 end of June- early July (DOY 175-188) and late July-early August (DOY 210-213). The  
428 three heat waves are shown as red, yellow and dark purple lines in Fig. 7; the overall time  
429 series is shown in blue (mid-day means are plotted for all variables). Mid-day  
430 temperatures exceeded  $30^\circ\text{C}$  during these heat wave events, while VPD-leaf exceeded 3  
431 kPa during the first heat wave and increased to a maximum of 5.3 kPa during the last  
432 event (Fig. 7b). During the first event,  $F_{OCS}$  was similar to days immediately prior (Fig.  
433 7c), but the canopy became a net source of  $\text{CO}_2$  during all three events (Fig. 7d). The  
434 third events lead to a reduction in  $F_{OCS}$ , even though the canopy had received some  
435 rainfall in the preceding weeks (Fig. 1c). Water vapor fluxes (Fig. 7e) increased during  
436 the first heat wave, compared to days immediately prior. The increased water vapor flux  
437 is likely form an increase in transpiration under high  $\text{VPD}_l$  (red bars in Fig. 7b). Even as  
438 canopy conductance (Fig. 7f) is reduced under the third heatwave, high  $\text{VPD}_l$  ensures a  
439 steady transpirational flux (purple bars in Fig. 7e).

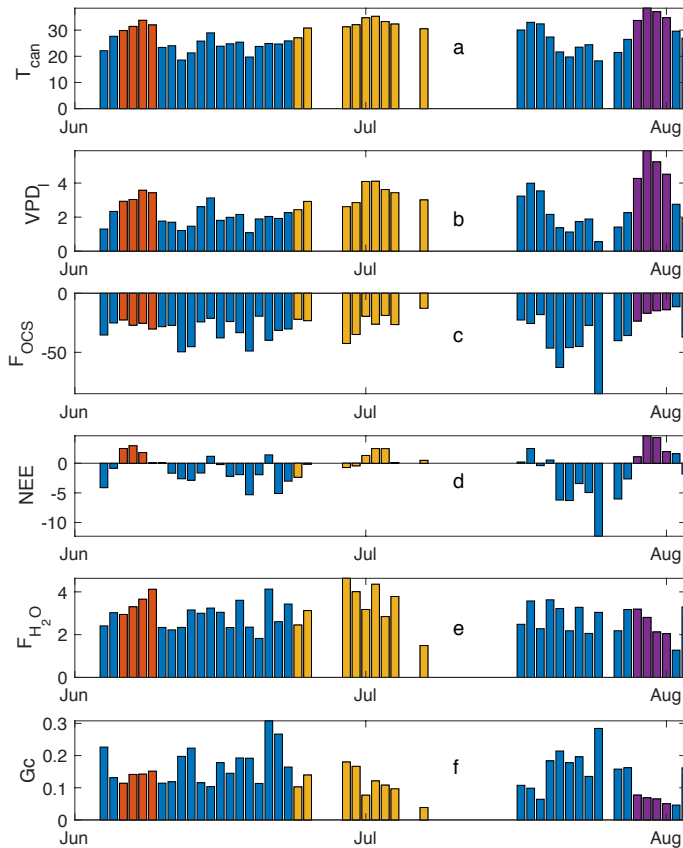

440

441 Figure 7. Mid-day means (11am-1pm local time) for three heat wave periods (plotted as  
 442 red, yellow and purple, while the overall time series is shown in blue). Variables  
 443 displayed are canopy temperature ( $^{\circ}C$ ; a), VPD-leaf (b),  $F_{OCS}$  (c), NEE (d), water vapor  
 444 flux (e), and canopy conductance ( $G_c$ , f). Units for each panel are the same as specified  
 445 in previous figures.

#### 446 4. Conclusions

447 Over hourly, daily and seasonal timescales, estimates of  $F_{OCS}$  generally tracked  
 448 fluctuations in GPP, implying stomatal control of carbon, water, and OCS fluxes at the  
 449 site. We used continuous in-situ measurements of OCS mixing ratios, collocated  
 450 measurements of water vapor fluxes, and air and canopy temperatures to calculate OCS  
 451 uptake. We found the forest to be a large sink for OCS, with sink strength peaking during  
 452 daylight hours. The mean LRU was  $\sim 4$ , and varied in response to changing light  
 453 conditions and canopy conductance. These LRUs are larger than observed from other  
 454 ecosystem scale studies, but well within the range of reported values (Whelan et al.,  
 455 2018; Sandoval-Soto et al., 2005). The forest surface was found to be a soil moisture  
 456 dependent sink of OCS. Ecosystem fluxes of OCS and  $CO_2$  were found to be strongly  
 457 sensitive to the ratio of diffuse: direct radiation reaching the top of the canopy. Uptake of  
 458 both OCS and  $CO_2$  increased as sky conditions changed from clear to partly cloudy. A  
 459 much smaller increase in uptake was observed as sky conditions changed from partly  
 460 cloudy to overcast, except during the early summer, when soil moisture was not limiting.  
 461 This change was mediated by the sensitivity of stomata to changing cloudiness and soil

462 moisture, as estimated from canopy conductance. Finally, we examined the response of  
463 OCS, CO<sub>2</sub> and H<sub>2</sub>O fluxes on heatwaves, and found that sequential heatwaves lead to  
464 suppression in stomatal gas exchange of all three fluxes.

465 Our results support the growing body of work that suggests ecosystem-scale OCS uptake  
466 is controlled by stomatal dynamics. While moist old-growth forests in Pacific  
467 Northwestern U.S. do not represent a very large fraction of the global terrestrial surface  
468 area, results from this study are likely relevant for other old-growth forests, particularly  
469 high LAI and very wet forests with extensive epiphyte cover, which are widespread in the  
470 humid tropics.

471 Acknowledgements:

472 This work was partly funded by NASA SBIR Phase II award NNX12CD21P to LGR,  
473 Inc. (“Ultrasensitive Analyzer for Realtime, In-Situ Airborne and Terrestrial  
474 Measurements of OCS, CO<sub>2</sub>, and CO.”). We would like to thank the US Forest Service  
475 and the University of Washington for letting us use the research facility at Wind River. In  
476 particular, we wish to sincerely acknowledge Ken Bible and Matt Schroeder for their help  
477 with setting up the experiment as well as maintenance throughout the measurement  
478 campaign. Data collected and used in this study can be accessed at  
479 [ftp.fsl.orst.edu/rastogib/Biogeosciences2018\\_Rastogi](ftp.fsl.orst.edu/rastogib/Biogeosciences2018_Rastogi).

480 References:

481 Adams, W. W. and Demmig-Adams, B.: Carotenoid composition and down regulation of  
482 photosystem II in three conifer species during the winter, *Physiol. Plant.*, 92(3), 451–458,  
483 doi:10.1111/j.1399-3054.1994.tb08835.x, 1994.

484 Alton, P. B., North, P. R. and Los, S. O.: The impact of diffuse sunlight on canopy light-  
485 use efficiency, gross photosynthetic product and net ecosystem exchange in three forest  
486 biomes, *Glob. Chang. Biol.*, 13(4), 776–787, doi:10.1111/j.1365-2486.2007.01316.x,  
487 2007.

488 Asaf, D., Rotenberg, E., Tatarinov, F., Dicken, U., Montzka, S. A. and Yakir, D.:  
489 Ecosystem photosynthesis inferred from measurements of carbonyl sulphide flux, *Nat.*  
490 *Geosci.*, 6(3), 186–190, doi:10.1038/ngeo1730, 2013.

491 Belviso, S., Reiter, I. M., Loubet, B., Gros, V., Lathièrre, J., Montagne, D., Delmotte, M.,  
492 Ramonet, M., Kalogridis, C., Lebeque, B., Bonnaire, N., Kazan, V., Gauquelin, T.,  
493 Fernandez, C. and Genty, B.: A top-down approach of surface carbonyl sulfide exchange  
494 by a Mediterranean oak forest ecosystem in Southern France, *Atmos. Chem. Phys.*  
495 *Discuss.*, (June 2012), 1–25, doi:10.5194/acp-2016-525, 2016.

496 Berkelhammer, M., Asaf, D., Still, C., Montzka, S., Noone, D., Gupta, M., Provencal, R.,  
497 Chen, H. and Yakir, D.: Constraining surface carbon fluxes using in situ measurements of  
498 carbonyl sulfide and carbon dioxide, *Global Biogeochem. Cycles*, 28(2), 161–179,  
499 doi:10.1002/2013GB004644, 2014.

- 500 Berkelhammer, M., Steen-Larsen, H. C., Cosgrove, A., Peters, A. J., Johnson, R.,  
501 Hayden, M. and Montzka, S. A.: Radiation and atmospheric circulation controls on  
502 carbonyl sulfide concentrations in the marine boundary layer, *J. Geophys. Res.*, 121(21),  
503 13,113–13,128, doi:10.1002/2016JD025437, 2016.
- 504 Berry, J., Wolf, A., Campbell, J. E., Baker, I., Blake, N., Blake, D., Denning, A. S.,  
505 Kawa, S. R., Montzka, S. A., Seibt, U., Stimler, K., Yakir, D. and Zhu, Z.: A coupled  
506 model of the global cycles of carbonyl sulfide and CO<sub>2</sub>: A possible new window on the  
507 carbon cycle, *J. Geophys. Res. Biogeosciences*, 118(2), 842–852,  
508 doi:10.1002/jgrg.20068, 2013.
- 509 Billesbach, D. P., Berry, J. A., Seibt, U., Maseyk, K., Torn, M. S., Fischer, M. L., Abu-  
510 Naser, M. and Campbell, J. E.: Growing season eddy covariance measurements of  
511 carbonyl sulfide and CO<sub>2</sub> fluxes: COS and CO<sub>2</sub> relationships in Southern Great Plains  
512 winter wheat, *Agric. For. Meteorol.*, 184, 48–55, doi:10.1016/j.agrformet.2013.06.007,  
513 2014.
- 514 Bloem, E., Haneklaus, S., Kesselmeier, J. and Schnug, E.: Sulfur fertilization and fungal  
515 infections affect the exchange of H<sub>2</sub>S and COS from agricultural crops, *J. Agric. Food  
516 Chem.*, 60(31), 7588–7596, doi:10.1021/jf301912h, 2012.
- 517 Blonquist, J. M., Montzka, S. A., Munger, J. W., Yakir, D., Desai, A. R., Dragoni, D.,  
518 Griffis, T. J., Monson, R. K., Scott, R. L. and Bowling, D. R.: The potential of carbonyl  
519 sulfide as a proxy for gross primary production at flux tower sites, *J. Geophys. Res.  
520 Biogeosciences*, 116(4), 1–18, doi:10.1029/2011JG001723, 2011.
- 521 Campbell, J. E., Berry, J., Seibt, U., Smith, S., Nature, S. M.- and 2017, U.: Large  
522 historical growth in global terrestrial gross primary production, *nature.com*, 544(7468),  
523 84 [online] Available from: <https://www.nature.com/articles/nature22030> (Accessed 29  
524 January 2018a), 2017.
- 525 Campbell, J. E., Whelan, M. E., Berry, J. A., Hilton, T. W., Zumkehr, A., Stinecipher, J.,  
526 Lu, Y., Kornfeld, A., Seibt, U., Dawson, T. E., Montzka, S. A., Baker, I. T., Kulkarni, S.,  
527 Wang, Y., Herndon, S. C., Zahniser, M. S., Commane, R. and Loik, M. E.: Plant Uptake  
528 of Atmospheric Carbonyl Sulfide in Coast Redwood Forests, *J. Geophys. Res.  
529 Biogeosciences*, 122(12), 3391–3404, doi:10.1002/2016JG003703, 2017b.
- 530 Cheng, S. J., Bohrer, G., Steiner, A. L., Hollinger, D. Y., Suyker, A., Phillips, R. P. and  
531 Nadelhoffer, K. J.: Variations in the influence of diffuse light on gross primary  
532 productivity in temperate ecosystems, *Agric. For. Meteorol.*, 201, 98–110,  
533 doi:10.1016/j.agrformet.2014.11.002, 2015.
- 534 Commane, R., Meredith, L. K., Baker, I. T., Berry, J. A., Munger, J. W., Montzka, S. A.,  
535 Templer, P. H., Juice, S. M., Zahniser, M. S. and Wofsy, S. C.: Seasonal fluxes of  
536 carbonyl sulfide in a midlatitude forest, *Proc. Natl. Acad. Sci.*, 112(46), 14162–14167,  
537 doi:10.1073/pnas.1504131112, 2015.
- 538 Dalton, M. M., Dello, K. D., Hawkins, L., Mote, P. W. and Rupp, D. E.: The third



- 539 Oregon climate assessment report, Oregon Clim. Chang. Res. Institute, Coll. Earth,  
540 Ocean Atmos. Sci. Oregon State Univ. Corvallis, OR, 2017.
- 541 Eastman, P. A. K. and Camm, E. L.: Regulation of photosynthesis in interior spruce  
542 during water stress: changes in gas exchange and chlorophyll fluorescence, *Tree Physiol.*,  
543 15(4), 229–235 [online] Available from: <http://dx.doi.org/10.1093/treephys/15.4.229>,  
544 1995.
- 545 Falk, M., Wharton, S., Schroeder, M., Ustin, S. L. and Paw U, K. T.: Flux partitioning in  
546 an old-growth forest: seasonal and interannual dynamics, *Tree Physiol.*, 28(4), 509–520,  
547 doi:10.1093/treephys/28.4.509, 2008.
- 548 Gimeno, T. E., Ogée, J., Royles, J., Gibon, Y., West, J. B., Burrell, R., Jones, S. P.,  
549 Sauze, J., Wohl, S., Benard, C., Genty, B. and Wingate, L.: Bryophyte gas-exchange  
550 dynamics along varying hydration status reveal a significant carbonyl sulphide (COS)  
551 sink in the dark and COS source in the light, *New Phytol.*, 215(3), 965–976,  
552 doi:10.1111/nph.14584, 2017.
- 553 Hilton, T., Whelan, M., Zumkehr, A., ... S. K.-N. C. and 2017, U.: Peak growing season  
554 gross uptake of carbon in North America is largest in the Midwest USA, *nature.com*,  
555 7(6), 450 [online] Available from: <https://www.nature.com/articles/nclimate3272>  
556 (Accessed 29 January 2018), 2017.
- 557 Hollinger, A. D. Y., Kelliher, F. M., Byers, J. N., Hunt, J. E., Mcseveny, T. M., Weir, L.,  
558 Ecology, S. and Jan, N.: Carbon Dioxide Exchange between an Undisturbed Old-Growth  
559 Temperate Forest and the Atmosphere Published by : Wiley Stable URL :  
560 <http://www.jstor.org/stable/1939390> REFERENCES Linked references are available on  
561 JSTOR for this article : You may need to log , , 75(1), 134–150, 2017.
- 562 Johnson, J. E., Bandy, A. R., Thornton, D. C. and Bates, T. S.: Measurements of  
563 atmospheric carbonyl sulfide during the NASA Chemical Instrumentation Test and  
564 Evaluation project: Implications for the global COS budget, *J. Geophys. Res.*, 98(D12),  
565 23443, doi:10.1029/92JD01911, 1993.
- 566 Kim, Y., Still, C. J., Hanson, C. V., Kwon, H., Greer, B. T. and Law, B. E.: Canopy skin  
567 temperature variations in relation to climate, soil temperature, and carbon flux at a  
568 ponderosa pine forest in central Oregon, *Agric. For. Meteorol.*, 226–227, 161–173,  
569 doi:10.1016/j.agrformet.2016.06.001, 2016.
- 570 Kitz, F., Gerdel, K., Hammerle, A., Laterza, T., Spielmann, F. M. and Wohlfahrt, G.: In  
571 situ soil COS exchange of a temperate mountain grassland under simulated drought,  
572 *Oecologia*, 183(3), 851–860, doi:10.1007/s00442-016-3805-0, 2017.
- 573 Kooijmans, L. M. J. J., Maseyk, K., Seibt, U., Sun, W., Vesala, T., Mammarella, I.,  
574 Kolari, P., Aalto, J., Franchin, A., Vecchi, R., Valli, G. and Chen, H.: Canopy uptake  
575 dominates nighttime carbonyl sulfide fluxes in a boreal forest, *Atmos. Chem. Phys.*,  
576 17(18), 11453–11465, doi:10.5194/acp-17-11453-2017, 2017.

577 Launois, T., Peylin, P., Belviso, S. and Poulter, B.: A new model of the global  
578 biogeochemical cycle of carbonyl sulfide - Part 2: Use of carbonyl sulfide to constrain  
579 gross primary productivity in current vegetation models, *Atmos. Chem. Phys.*, 15(16),  
580 9285–9312, doi:10.5194/acp-15-9285-2015, 2015.

581 Maseyk, K., Berry, J. A., Billesbach, D., Campbell, J. E., Torn, M. S., Zahniser, M. and  
582 Seibt, U.: Sources and sinks of carbonyl sulfide in an agricultural field in the Southern  
583 Great Plains, *Proc. Natl. Acad. Sci.*, 111(25), 9064–9069, doi:10.1073/pnas.1319132111,  
584 2014.

585 Notholt, J., Kuang, Z., Rinsland, C. P., Toon, G. C., Rex, M., Jones, N., Albrecht, T.,  
586 Deckelmann, H., Krieg, J. and Weinzierl, C.: Enhanced upper tropical tropospheric COS:  
587 Impact on the stratospheric aerosol layer, *Science* (80-. ), 300(5617), 307–310, 2003.

588 Parker, G. G., Harmon, M. E., Lefsky, M. A., Chen, J., Pelt, R. Van, Weis, S. B.,  
589 Thomas, S. C., Winner, W. E., Shaw, D. C. and Frankling, J. F.: Three-dimensional  
590 Structure of an Old-growth Pseudotsuga-Tsuga Canopy and Its Implications for Radiation  
591 Balance, Microclimate, and Gas Exchange, *Ecosystems*, 7(5), 440–453,  
592 doi:10.1007/s10021-004-0136-5, 2004.

593 Paw U, K. T., Falk, M., Suchanek, T. H., Ustin, S. L., Chen, J., Park, Y.-S., Winner, W.  
594 E., Thomas, S. C., Hsiao, T. C., Shaw, R. H., King, T. S., Pyles, R. D., Schroeder, M. and  
595 Matista, A. A.: Carbon Dioxide Exchange between an Old-Growth Forest and the  
596 Atmosphere, *Ecosystems*, 7(5), 513–524, doi:10.1007/s10021-004-0141-8, 2004.

597 Protoschill-Krebs, G Wilhelm, C Kesselmeier, J.: Consumption of carbonyl sulphide  
598 (COS) by higher plant carbonic anhydrase (CA), *Atmos. Environ.*, 30(18), 3151–3156  
599 [online] Available from:  
600 <https://www.sciencedirect.com/science/article/pii/135223109600026X> (Accessed 29  
601 January 2018), 1996.

602 Protoschill-Krebs, G. and Kesselmeier, J.: Enzymatic pathways for the consumption of  
603 carbonyl sulphide (COS) by higher plants, *Bot. Acta*, 105, 206–212 [online] Available  
604 from: <http://onlinelibrary.wiley.com/doi/10.1111/j.1438-8677.1992.tb00288.x/full>  
605 (Accessed 29 January 2018), 1992.

606 Reichstein, M., Falge, E., Baldocchi, D., Papale, D., Aubinet, M., Berbigier, P.,  
607 Bernhofer, C., Buchmann, N., Gilmanov, T. and Granier, A.: On the separation of net  
608 ecosystem exchange into assimilation and ecosystem respiration: review and improved  
609 algorithm, *Glob. Chang. Biol.*, 11(9), 1424–1439, 2005.

610 Sandoval-Soto, L., Stanimirov, M., von Hobe, M., Schmitt, V., Valdes, J., Wild, A. and  
611 Kesselmeier, J.: Global uptake of carbonyl sulfide (COS) by terrestrial vegetation:  
612 Estimates corrected by deposition velocities normalized to the uptake of carbon dioxide  
613 (CO<sub>2</sub>), *Biogeosciences Discuss.*, 2(1), 183–201,  
614 doi:10.5194/bgd-2-183-2005, 2005.

615 Seibt, U., Kesselmeier, J., Sandoval-Soto, L., Kuhn, U. and Berry, J. A.: A kinetic

- 616 analysis of leaf uptake of COS and its relation to transpiration, photosynthesis and carbon  
617 isotope fractionation, *Biogeosciences*, 7(1), 333–341, doi:10.5194/bg-7-333-2010, 2010.
- 618 Shaw, D., Franklin, J., Bible, K., Klopatek, J., Freeman, E., Greene, S. and Parker, G.:  
619 Ecological Setting of the Wind River Old-growth Forest, *Ecosystems*, 7(5), 427–439,  
620 doi:10.1007/s10021-004-0135-6, 2004.
- 621 Stimler, K., Nelson, D. and Yakir, D.: High precision measurements of atmospheric  
622 concentrations and plant exchange rates of carbonyl sulfide using mid-IR quantum  
623 cascade laser, *Glob. Chang. Biol.*, 16(9), 2496–2503, doi:10.1111/j.1365-  
624 2486.2009.02088.x, 2010a.
- 625 Stimler, K., Montzka, S. A., Berry, J. A., Rudich, Y. and Yakir, D.: Relationships  
626 between carbonyl sulfide (COS) and CO<sub>2</sub> during leaf gas exchange, *New Phytol.*, 186(4),  
627 869–878, doi:10.1111/j.1469-8137.2010.03218.x, 2010b.
- 628 Sun, W., Maseyk, K., Lett, C. and Seibt, U.: Litter dominates surface fluxes of carbonyl  
629 sulfide in a Californian oak woodland, *J. Geophys. Res. G Biogeosciences*, 121(2), 438–  
630 450, doi:10.1002/2015JG003149, 2016.
- 631 Urban, O., Janouš, D., Acosta, M., Czerný, R., Marková, I., Navrátil, M., Pavelka, M.,  
632 Pokorný, R., Šprtová, M., Zhang, R., Špunda, V. R., Grace, J. and Marek, M. V.:  
633 Ecophysiological controls over the net ecosystem exchange of mountain spruce stand.  
634 Comparison of the response in direct vs. diffuse solar radiation, *Glob. Chang. Biol.*,  
635 13(1), 157–168, doi:10.1111/j.1365-2486.2006.01265.x, 2007.
- 636 Wehr, R., Commane, R., Munger, J. W., Barry Mcmanus, J., Nelson, D. D., Zahniser, M.  
637 S., Saleska, S. R. and Wofsy, S. C.: Dynamics of canopy stomatal conductance,  
638 transpiration, and evaporation in a temperate deciduous forest, validated by carbonyl  
639 sulfide uptake, *Biogeosciences*, 14(2), 389–401, doi:10.5194/bg-14-389-2017, 2017.
- 640 Wharton, S. and Falk, M.: Climate indices strongly influence old-growth forest carbon  
641 exchange, *Environ. Res. Lett.*, 11(4), 1–11, doi:10.1088/1748-9326/11/4/044016, 2016.
- 642 Wharton, S., Falk, M., Bible, K., Schroeder, M. and Paw U, K. T.: Old-growth CO<sub>2</sub> flux  
643 measurements reveal high sensitivity to climate anomalies across seasonal, annual and  
644 decadal time scales, *Agric. For. Meteorol.*, 161, 1–14,  
645 doi:10.1016/j.agrformet.2012.03.007, 2012.
- 646 Whelan, M. E., Hilton, T. W., Berry, J. A., Berkelhammer, M., Desai, A. R. and  
647 Campbell, J. E.: Carbonyl sulfide exchange in soils for better estimates of ecosystem  
648 carbon uptake, *Atmos. Chem. Phys.*, 16(6), 3711–3726, 2016.
- 649 Whelan, M. E., Lennartz, S. T., Gimeno, T. E., Wehr, R., Wohlfahrt, G., Wang, Y.,  
650 Kooijmans, L. M. J., Hilton, T. W., Belviso, S., Peylin, P., Commane, R., Sun, W., Chen,  
651 H., Kuai, L., Mammarella, I., Maseyk, K., Berkelhammer, M., Li, K.-F., Yakir, D.,  
652 Zumkehr, A., Katayama, Y., Ogée, J., Spielmann, F. M., Kitz, F., Rastogi, B.,  
653 Kesselmeier, J., Marshall, J., Erkkilä, K.-M., Wingate, L., Meredith, L. K., He, W., Bunk,

654 R., Launois, T., Vesala, T., Schmidt, J. A., Fichot, C. G., Seibt, U., Saleska, S., Saltzman,  
655 E. S., Montzka, S. A., Berry, J. A. and Campbell, J. E.: Reviews and Syntheses: Carbonyl  
656 Sulfide as a Multi-scale Tracer for Carbon and Water Cycles, *Biogeosciences Discuss.*,  
657 (October), 1–97, doi:10.5194/bg-2017-427, 2017.

658 Winner, W., Thomas, S., Berry, J., Bond, B., Cooper, C., Hinckley, T., Ehleringer, J.,  
659 Fessenden, J., Lamb, B., McCarthy, S., McDowell, N., Phillips, N. and Williams, M.:  
660 Canopy Carbon Gain and Water Use: Analysis of Old-growth Conifers in the Pacific  
661 Northwest, *Ecosystems*, 7(5), 482–497, doi:10.1007/s10021-004-0139-2, 2004.

662 Wohlfahrt, G., Brilli, F., Hörtnagl, L., Xu, X., Bingemer, H., Hansel, A. and Loreto, F.:  
663 Carbonyl sulfide (COS) as a tracer for canopy photosynthesis, transpiration and stomatal  
664 conductance: Potential and limitations, *Plant, Cell Environ.*, 35(4), 657–667,  
665 doi:10.1111/j.1365-3040.2011.02451.x, 2012.

666 Woodruff, D. R., Mcculloh, K. A., Warren, J. M., Meinzer, F. C. and Lachenbruch, B.:  
667 Impacts of tree height on leaf hydraulic architecture and stomatal control in Douglas-fir,  
668 *Plant, Cell Environ.*, 30(5), 559–569, doi:10.1111/j.1365-3040.2007.01652.x, 2007.

669
